# Supplementary material for: Developing muscarinic receptor M1 classification models utilizing transfer learning and generative AI techniques
Source: Springer Nature journal article supplement (doi:10.1038/s41598-025-00972-w), 2025-05-12
Supplement: MOESM1 [file 41598_2025_972_MOESM1_ESM.pdf]

# Developing muscarinic receptor M1 classification models utilizing transfer learning and generative AI techniques

*Souvik Dey<sup>1,2</sup>, Anders Wallqvist<sup>1\*</sup>, and Mohamed Diwan M. AbdulHameed<sup>1,2\*</sup>*

<sup>1</sup>Department of Defense Biotechnology High Performance Computing Software Applications Institute, Defense Health Agency Research & Development, Medical Research and Development Command, Fort Detrick, MD, USA

<sup>2</sup>The Henry M. Jackson Foundation for the Advancement of Military Medicine, Inc., Bethesda, MD, USA

\*Corresponding Authors:

AW E-mail: [sven.a.wallqvist.civ@health.mil](mailto:sven.a.wallqvist.civ@health.mil)

MDMA E-mail: [mabdulhameed@bhsai.org](mailto:mabdulhameed@bhsai.org)

DoD Biotechnology High Performance Computing Software Applications Institute  
Defense Health Agency Research & Development  
Medical Research and Development Command  
ATTN: FCMR-TT, 504 Scott Street  
Fort Detrick, MD 21702-5012  
Tel: (301) 619-1989; Fax: (301) 619-1983

**Table S1.** Details of our hyperparameter optimization protocol

| <b>Hyperparameters</b>  | <b>Tuning space</b>                                                                                                                                                      | <b>Optimal choice</b> |
|-------------------------|--------------------------------------------------------------------------------------------------------------------------------------------------------------------------|-----------------------|
| Number of hidden layers | 1/2/3                                                                                                                                                                    | 2                     |
| Number of neurons       | 100/500/1,000/2,000/4,000/6,000 (1 hidden layer)<br>1,000/2,000/4,000 and 100/500/1,000/2,000 (2 hidden layers)<br>1,000/2,000, 500/1,000, and 100/500 (3 hidden layers) | 1,000 and 500         |
| Dropout rates           | 0.05/0.10/0.25/0.50                                                                                                                                                      | 0.25                  |
| Activation functions    | ReLU/Sigmoid/tanh/Leaky ReLU                                                                                                                                             | ReLU                  |
| Learning rate           | 0.01/0.001                                                                                                                                                               | 0.001                 |

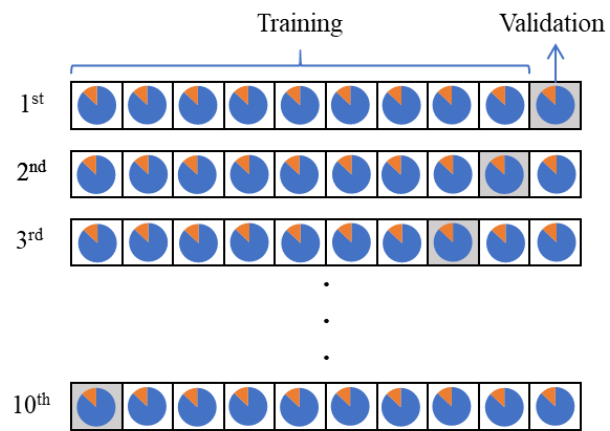

**Figure S1.** Concept of the stratified 10-fold cross validation.

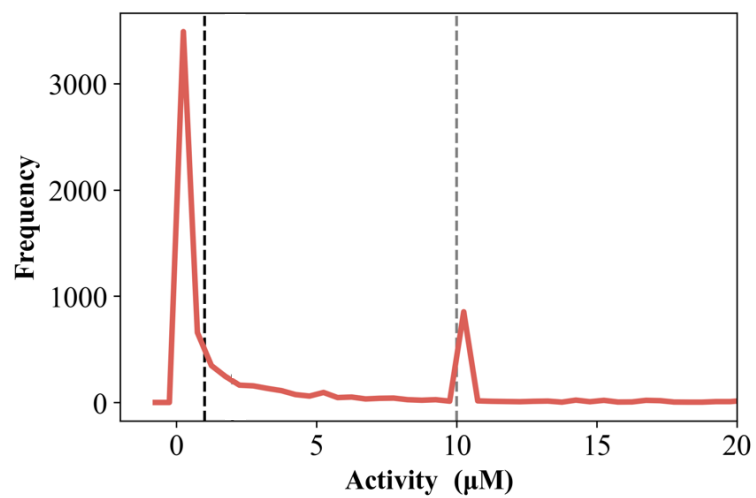

**Figure S2.** Histogram of the M1 bioactivity data from public sources. The inactive (10  $\mu\text{M}$ ) and active (1  $\mu\text{M}$ ) cutoffs are shown as gray and black dashed lines, respectively.

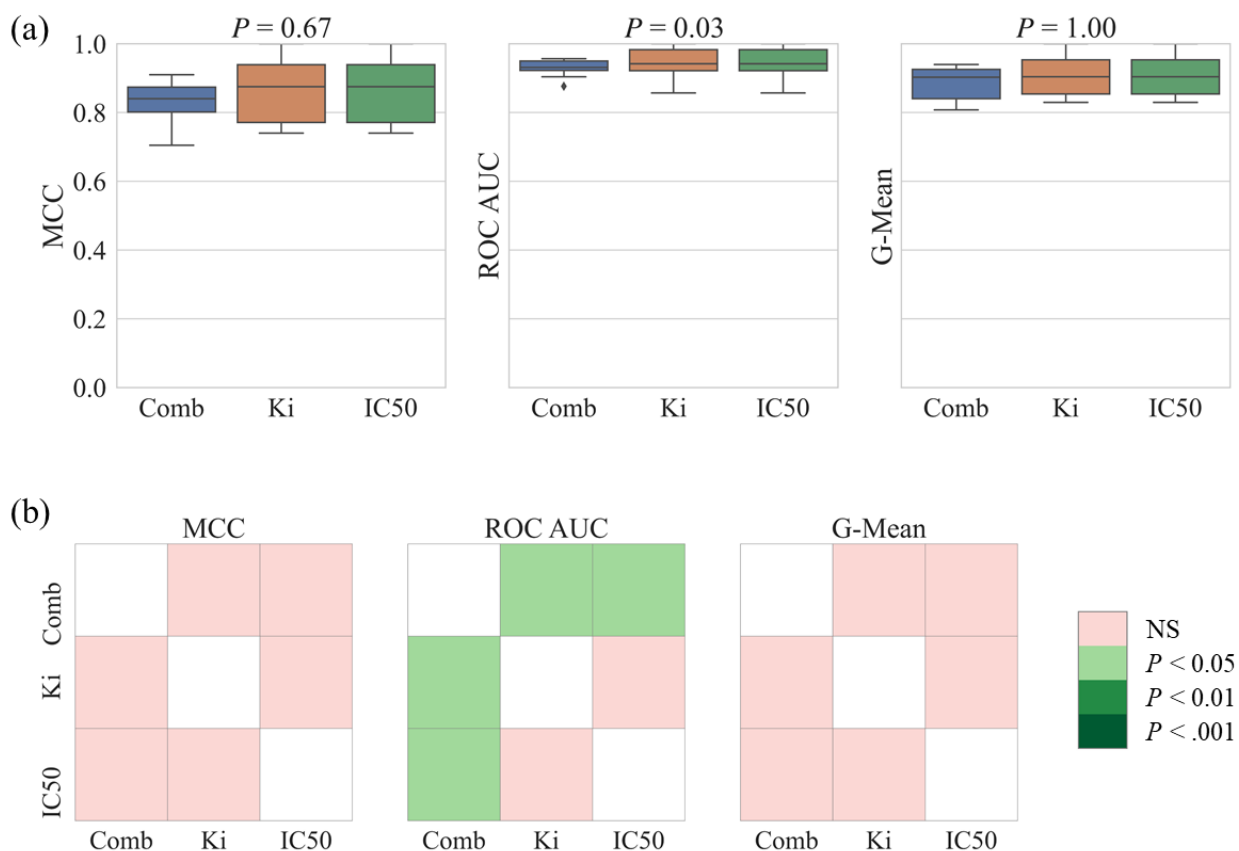

**Figure S3.** Statistical comparisons of the performance of different datasets containing only  $IC_{50}$  and  $K_i$  against the combined dataset during 10-fold cross validation. (a) Boxplots showing comparisons of different datasets (Combined, Only  $K_i$ , and Only  $IC_{50}$ ) comparing MCC, ROC AUC, and G-Mean. The  $P$ -value determined using Friedman's test is shown above each panel. (b) Sign plots showing results from the Conover-Friedman test. MCC: Matthews correlation coefficient; ROC AUC: area under the receiver operating characteristic curve; G-Mean: geometric mean of sensitivity and specificity; NS: not significant.

**Table S2.** Performance of different datasets containing only IC<sub>50</sub> and K<sub>i</sub> against the combined dataset during 10-fold cross validation of the training set

| <b>Model</b>              | <b>Sensitivity</b> | <b>Specificity</b> | <b>MCC</b>  | <b>ROC AUC</b> | <b>G-Mean</b> |
|---------------------------|--------------------|--------------------|-------------|----------------|---------------|
| DNN-Combined              | 0.99 (0.01)        | 0.80 (0.09)        | 0.83 (0.06) | 0.93 (0.03)    | 0.89 (0.05)   |
| DNN-Only K <sub>i</sub>   | 0.99 (0.01)        | 0.81 (0.06)        | 0.87 (0.04) | 0.92 (0.03)    | 0.90 (0.03)   |
| DNN-Only IC <sub>50</sub> | 0.99 (0.02)        | 0.84 (0.11)        | 0.86 (0.09) | 0.94 (0.05)    | 0.91 (0.06)   |

Data are presented as mean (standard deviation). MCC: Matthews correlation coefficient; ROC AUC: area under the receiver operating characteristic curve; G-Mean: geometric mean of sensitivity and specificity; DNN: deep neural network.

**Table S3.** Properties of the generated inactives as defined in MOSES<sup>1</sup>

| Property                       | RNN  | R4   |
|--------------------------------|------|------|
| Valid                          | 0.03 | 1.00 |
| Unique@1k                      | 0.96 | 1.00 |
| Unique@10k                     | 0.89 | 1.00 |
| Novelty                        | 0.99 | 0.99 |
| Similarity to nearest neighbor | 0.27 | 0.47 |
| Internal diversity             | 0.89 | 0.89 |

RNN: recurrent neural network; R4: REINVENT4.

**Table S4.** Performance of different models on the imbalanced dataset during 10-fold cross validation

| Model         | Sensitivity | Specificity | MCC         | ROC AUC     | G-Mean      |
|---------------|-------------|-------------|-------------|-------------|-------------|
| Naïve Bayes   | 0.89 (0.02) | 0.91 (0.05) | 0.66 (0.05) | 0.90 (0.03) | 0.90 (0.03) |
| Random forest | 0.99 (0.01) | 0.73 (0.11) | 0.79 (0.06) | 0.86 (0.05) | 0.85 (0.06) |
| XGBoost       | 0.98 (0.01) | 0.79 (0.11) | 0.81 (0.07) | 0.89 (0.05) | 0.88 (0.06) |
| DNN           | 0.99 (0.01) | 0.80 (0.09) | 0.83 (0.06) | 0.93 (0.03) | 0.89 (0.05) |

Data are presented as mean (standard deviation). MCC: Matthews correlation coefficient; ROC AUC: area under the receiver operating characteristic curve; G-Mean: geometric mean of sensitivity and specificity; DNN: deep neural network.

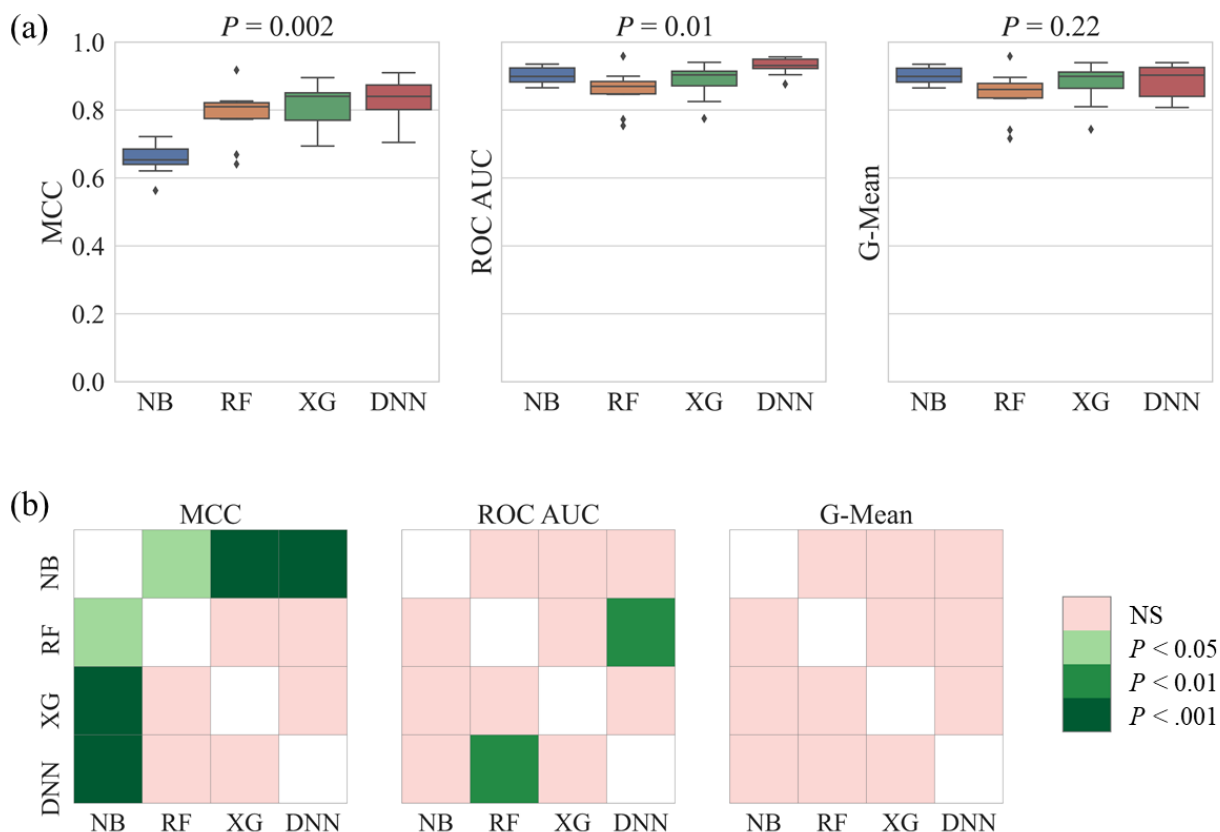

**Figure S4.** Statistical comparisons of the performance of different models on the imbalanced dataset during 10-fold cross validation. (a) Boxplots showing comparisons of different methods comparing MCC, ROC AUC, and G-Mean. The  $P$ -value determined using Friedman's test is shown above each panel. (b) Sign plots showing the results from the Conover-Friedman test. MCC: Matthews correlation coefficient; ROC AUC: area under the receiver operating characteristic curve; G-Mean: geometric mean of sensitivity and specificity; DNN: deep neural network; XG: XGBoost; RF: random forest; NB: Naïve Bayes; NS: not significant.

**Table S5.** Performance of the DNN compared with the two proposed dataset-balancing methods (TL and RNN/R4) during 10-fold cross validation

| <b>Model</b> | <b>Sensitivity</b> | <b>Specificity</b> | <b>MCC</b>  | <b>ROC AUC</b> | <b>G-Mean</b> |
|--------------|--------------------|--------------------|-------------|----------------|---------------|
| DNN          | 0.99 (0.01)        | 0.80 (0.09)        | 0.83 (0.06) | 0.93 (0.03)    | 0.89 (0.05)   |
| DNN-TL       | 0.98 (0.01)        | 0.80 (0.05)        | 0.80 (0.03) | 0.92 (0.02)    | 0.89 (0.03)   |
| DNN-RNN      | 0.97 (0.01)        | 0.96 (0.01)        | 0.93 (0.02) | 0.98 (0.01)    | 0.97 (0.01)   |
| DNN-R4       | 0.97 (0.01)        | 0.96 (0.01)        | 0.93 (0.01) | 0.98 (0.01)    | 0.96 (0.01)   |

Data are presented as mean (standard deviation). MCC: Matthews correlation coefficient; ROC AUC: area under the receiver operating characteristic curve; G-Mean: geometric mean of sensitivity and specificity; DNN: deep neural network; TL: transfer learning; RNN: recurrent neural network; R4: REINVENT4.

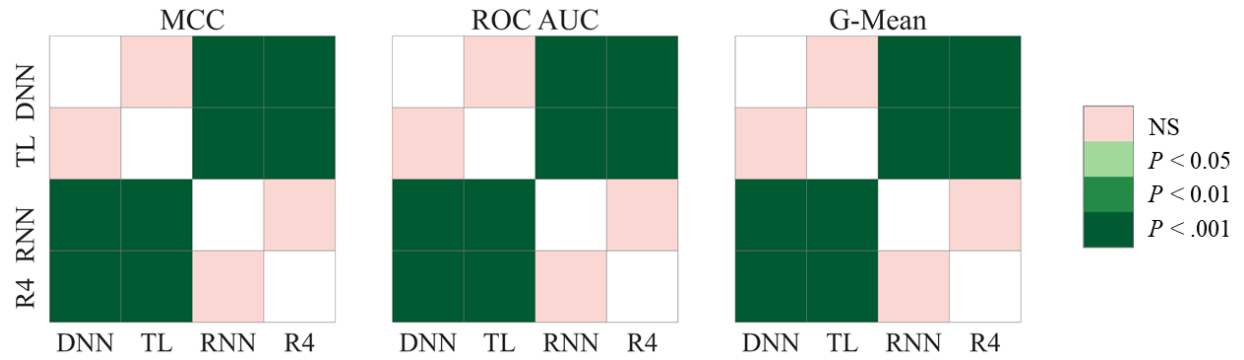

**Figure S5.** Statistical comparison of the DNN against the two dataset-balancing methods (TL and RNN/R4) during 10-fold cross validation using sign plots showing results from the Conover-Friedman test for MCC, ROC AUC, and G-Mean. MCC: Matthews correlation coefficient; ROC AUC: area under the receiver operating characteristic curve; G-Mean: geometric mean of sensitivity and specificity; DNN: deep neural network; TL: transfer learning; RNN: recurrent neural network; R4: REINVENT4; NS: not significant.

**Table S6.** Performance of the DNN compared with the two proposed dataset-balancing methods (TL and RNN/R4) and three traditional approaches during scaffold-split-generated test set prediction

| Model             | Sensitivity | Specificity | MCC         | ROC AUC     | G-Mean      |
|-------------------|-------------|-------------|-------------|-------------|-------------|
| DNN               | 0.97 (0.00) | 0.37 (0.03) | 0.45 (0.03) | 0.72 (0.02) | 0.60 (0.03) |
| DNN-TL            | 0.95 (0.01) | 0.47 (0.04) | 0.45 (0.02) | 0.75 (0.01) | 0.67 (0.02) |
| DNN-RNN           | 0.91 (0.01) | 0.58 (0.03) | 0.45 (0.02) | 0.78 (0.01) | 0.73 (0.02) |
| DNN-R4            | 0.90 (0.01) | 0.64 (0.03) | 0.50 (0.02) | 0.81 (0.01) | 0.76 (0.02) |
| XGBoost-ENN       | 0.95 (0.00) | 0.51 (0.04) | 0.48 (0.03) | 0.73 (0.02) | 0.69 (0.03) |
| XGBoost-SMOTE-ENN | 0.93 (0.01) | 0.55 (0.03) | 0.48 (0.02) | 0.74 (0.01) | 0.72 (0.02) |
| XGBoost-KSMOTE    | 0.95 (0.01) | 0.43 (0.03) | 0.43 (0.02) | 0.69 (0.01) | 0.64 (0.02) |

Data are presented as mean (standard deviation). MCC: Matthews correlation coefficient; ROC AUC: area under the receiver operating characteristic curve; G-Mean: geometric mean of sensitivity and specificity; DNN: deep neural network; TL: transfer learning; RNN: recurrent neural network; R4: REINVENT4; ENN: edited nearest neighbor; SMOTE-ENN: Synthetic Minority Oversampling Technique and edited nearest neighbor; KSMOTE: K-means SMOTE.

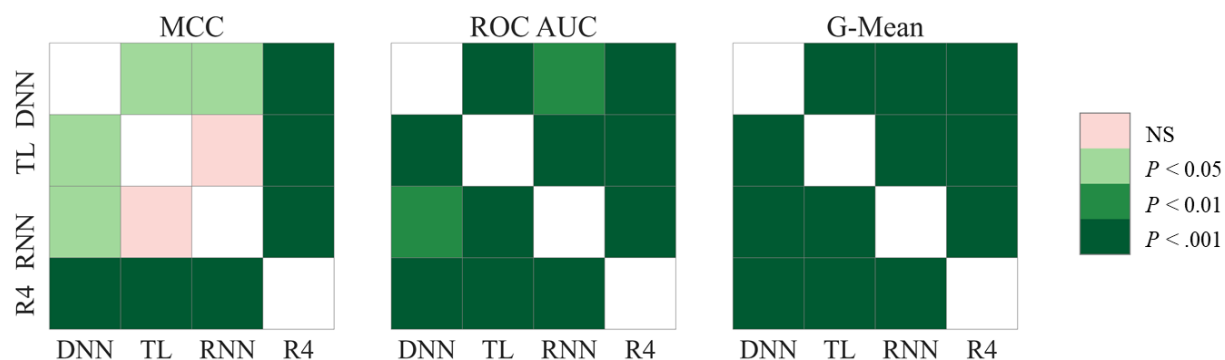

**Figure S6.** Statistical comparison of the DNN against the two dataset-balancing methods (TL and RNN/R4) during scaffold-split-generated test set prediction using sign plots showing the results from the Conover-Friedman test for MCC, ROC AUC, and G-Mean. MCC: Matthews correlation coefficient; ROC AUC: area under the receiver operating characteristic curve; G-Mean: geometric mean of sensitivity and specificity; DNN: deep neural network; TL: transfer learning; RNN: recurrent neural network; R4: REINVENT4; NS: not significant.

**Table S7.** Performance of the DNN compared with the two proposed dataset-balancing methods (TL and RNN/R4) and three traditional approaches during HTS test set prediction

| Model             | Sensitivity | Specificity | MCC         | ROC AUC     | G-Mean      |
|-------------------|-------------|-------------|-------------|-------------|-------------|
| DNN               | 0.94 (0.01) | 0.08 (0.01) | 0.01 (0.00) | 0.52 (0.01) | 0.27 (0.02) |
| DNN-TL            | 0.90 (0.02) | 0.14 (0.03) | 0.01 (0.00) | 0.53 (0.01) | 0.36 (0.03) |
| DNN-RNN           | 0.68 (0.02) | 0.38 (0.03) | 0.01 (0.00) | 0.54 (0.01) | 0.51 (0.01) |
| DNN-R4            | 0.56 (0.02) | 0.56 (0.02) | 0.03 (0.00) | 0.57 (0.01) | 0.56 (0.01) |
| XGBoost-ENN       | 0.93 (0.01) | 0.09 (0.01) | 0.01 (0.02) | 0.51 (0.00) | 0.29 (0.02) |
| XGBoost-SMOTE-ENN | 0.90 (0.01) | 0.12 (0.03) | 0.01 (0.02) | 0.50 (0.00) | 0.32 (0.01) |
| XGBoost-KSMOTE    | 0.95 (0.01) | 0.06 (0.01) | 0.00 (0.00) | 0.50 (0.00) | 0.23 (0.02) |

Data are presented as mean (standard deviation). MCC: Matthews correlation coefficient; ROC AUC: area under the receiver operating characteristic curve; G-Mean: geometric mean of sensitivity and specificity; HTS: high-throughput screening; DNN: deep neural network; TL: transfer learning; RNN: recurrent neural network; R4: REINVENT4; ENN: edited nearest neighbor; SMOTE-ENN: Synthetic Minority Oversampling Technique and edited nearest neighbor; KSMOTE: K-means SMOTE.

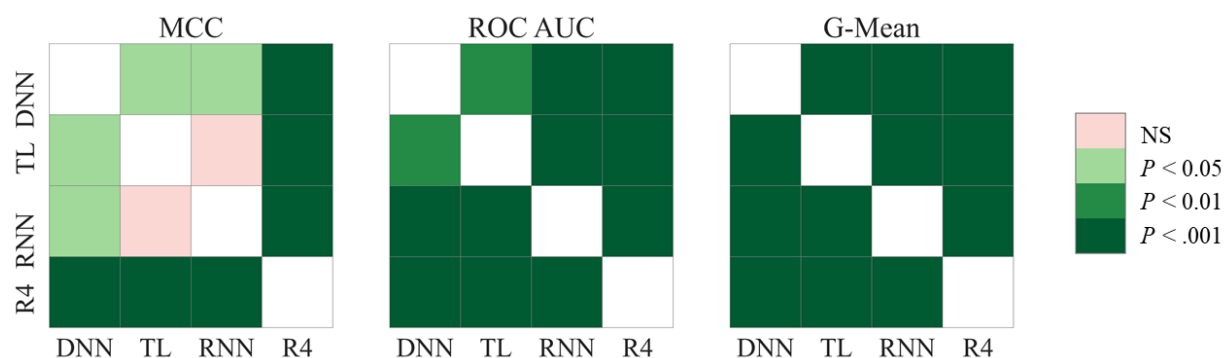

**Figure S7.** Statistical comparison of the DNN against the two dataset-balancing methods (TL and RNN/R4) during HTS test set prediction using sign plots showing the results from the Conover-Friedman test for MCC, ROC AUC, and G-Mean. MCC: Matthews correlation coefficient; ROC AUC: area under the receiver operating characteristic curve; G-Mean: geometric mean of sensitivity and specificity; HTS: high-throughput screening; DNN: deep neural network; TL: transfer learning; RNN: recurrent neural network; R4: REINVENT4; NS: not significant.

**Table S8.** Performance of the DNN compared with the two proposed dataset-balancing methods (TL and RNN/R4) during DrugBank test set prediction

| Model   | Accuracy    |
|---------|-------------|
| DNN     | 0.97 (0.00) |
| DNN-TL  | 1.00 (0.00) |
| DNN-RNN | 0.95 (0.01) |
| DNN-R4  | 0.92 (0.02) |

Data are presented as mean (standard deviation). DNN: deep neural network; TL: transfer learning; RNN: recurrent neural network; R4: REINVENT4.

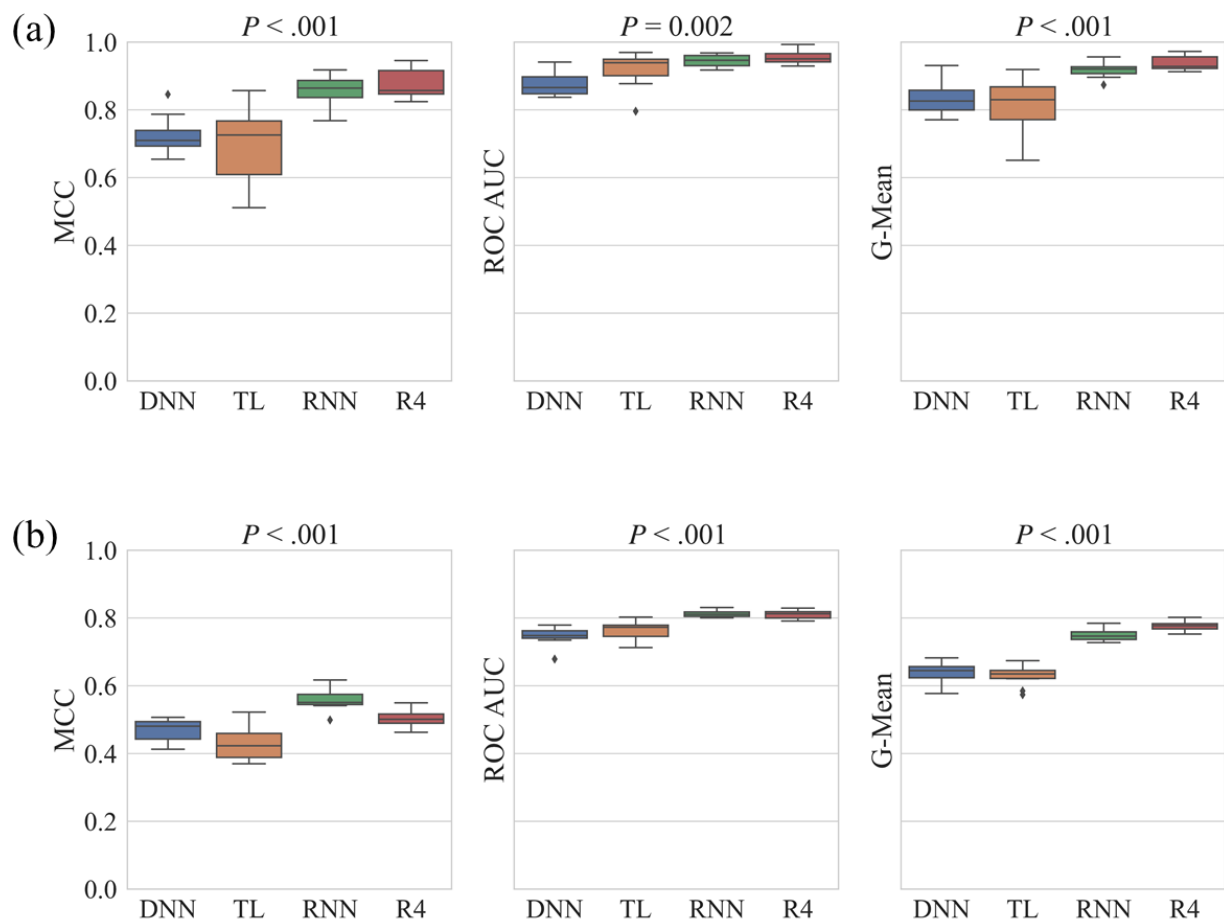

**Figure S8.** Boxplots comparing the performance of DNN models for beta-2 adrenergic receptor against the two dataset-balancing methods (TL and RNN/R4) during (a) 10-fold cross validation and (b) scaffold-split-generated test set for MCC, ROC AUC, and G-Mean. The  $P$ -value determined using Friedman's test is shown above each plot. MCC: Matthews correlation coefficient; ROC AUC: area under the receiver operating characteristic curve; G-Mean: geometric mean of sensitivity and specificity; DNN: deep neural network; TL: transfer learning; RNN: recurrent neural network; R4: REINVENT4.

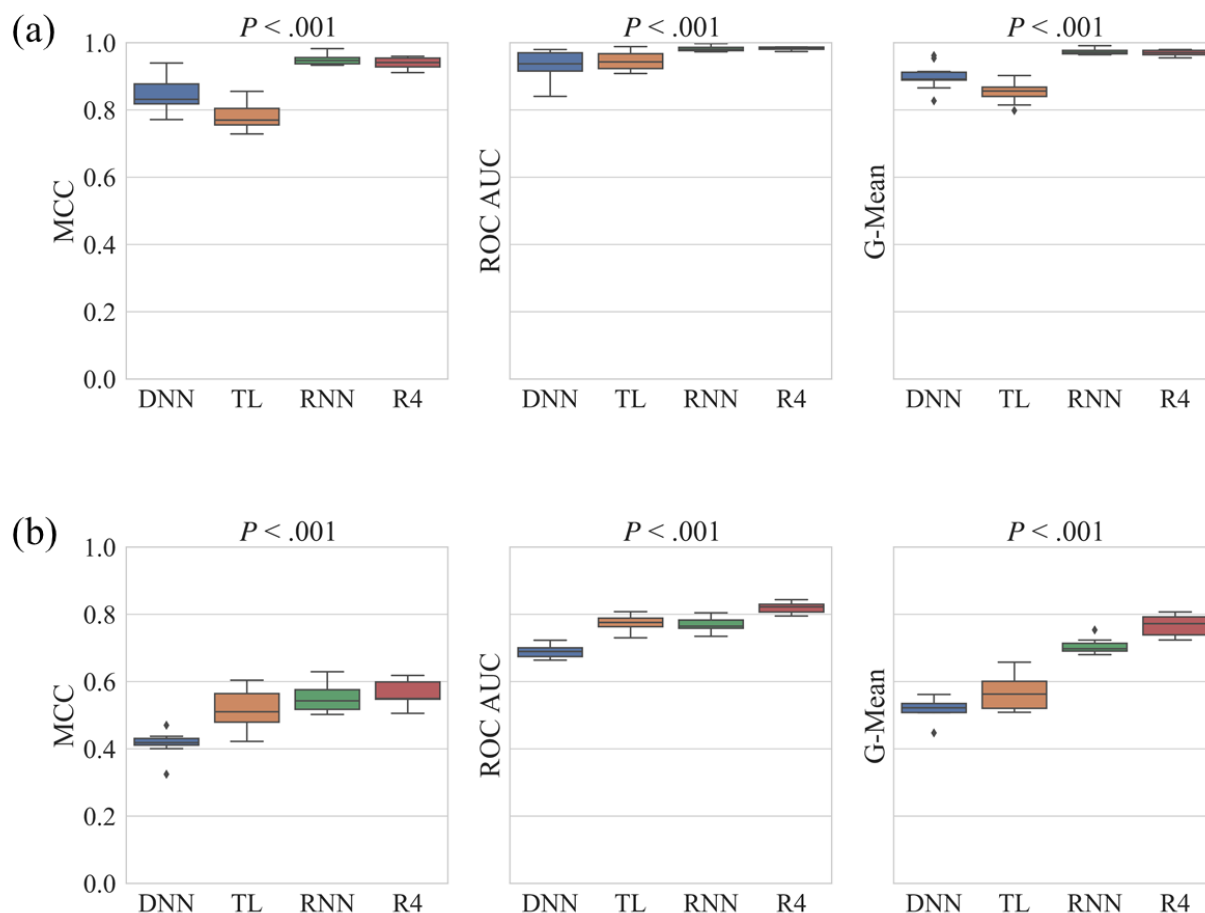

**Figure S9.** Boxplots comparing the performance of DNN models for adenosine receptor A2a against the two dataset-balancing methods (TL and RNN/R4) during (a) 10-fold cross validation and (b) scaffold-split-generated test set for MCC, ROC AUC, and G-Mean. The *P*-value determined using Friedman's test is shown above each plot. MCC: Matthews correlation coefficient; ROC AUC: area under the receiver operating characteristic curve; G-Mean: geometric mean of sensitivity and specificity; DNN: deep neural network; TL: transfer learning; RNN: recurrent neural network; R4: REINVENT4.

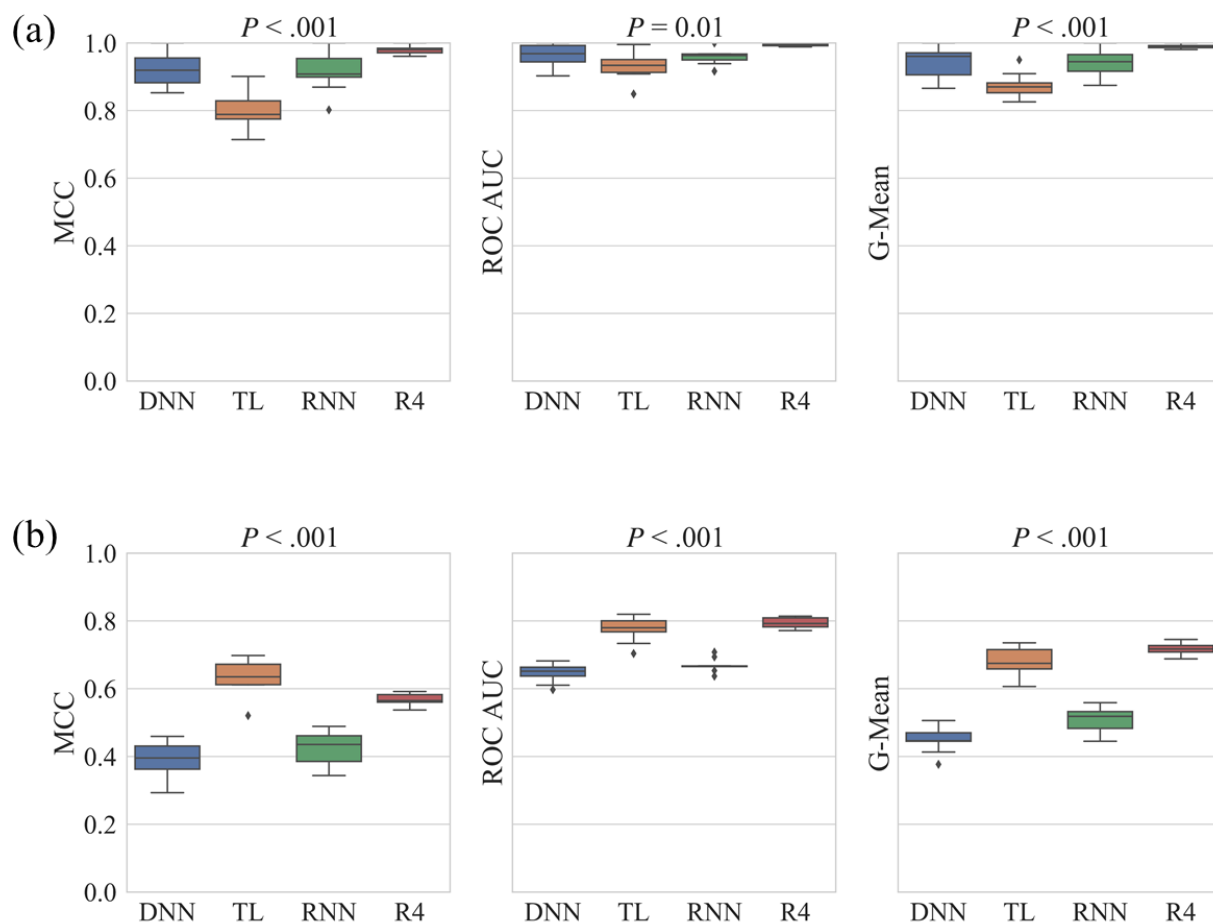

**Figure S10.** Boxplots comparing the performance of DNN models for C-C chemokine receptor type 5 against the two dataset-balancing methods (TL and RNN/R4) during (a) 10-fold cross validation and (b) scaffold-split-generated test set for MCC, ROC AUC, and G-Mean. The  $P$ -value determined using Friedman's test is shown above each plot. MCC: Matthews correlation coefficient; ROC AUC: area under the receiver operating characteristic curve; G-Mean: geometric mean of sensitivity and specificity; DNN: deep neural network; TL: transfer learning; RNN: recurrent neural network; R4: REINVENT4.

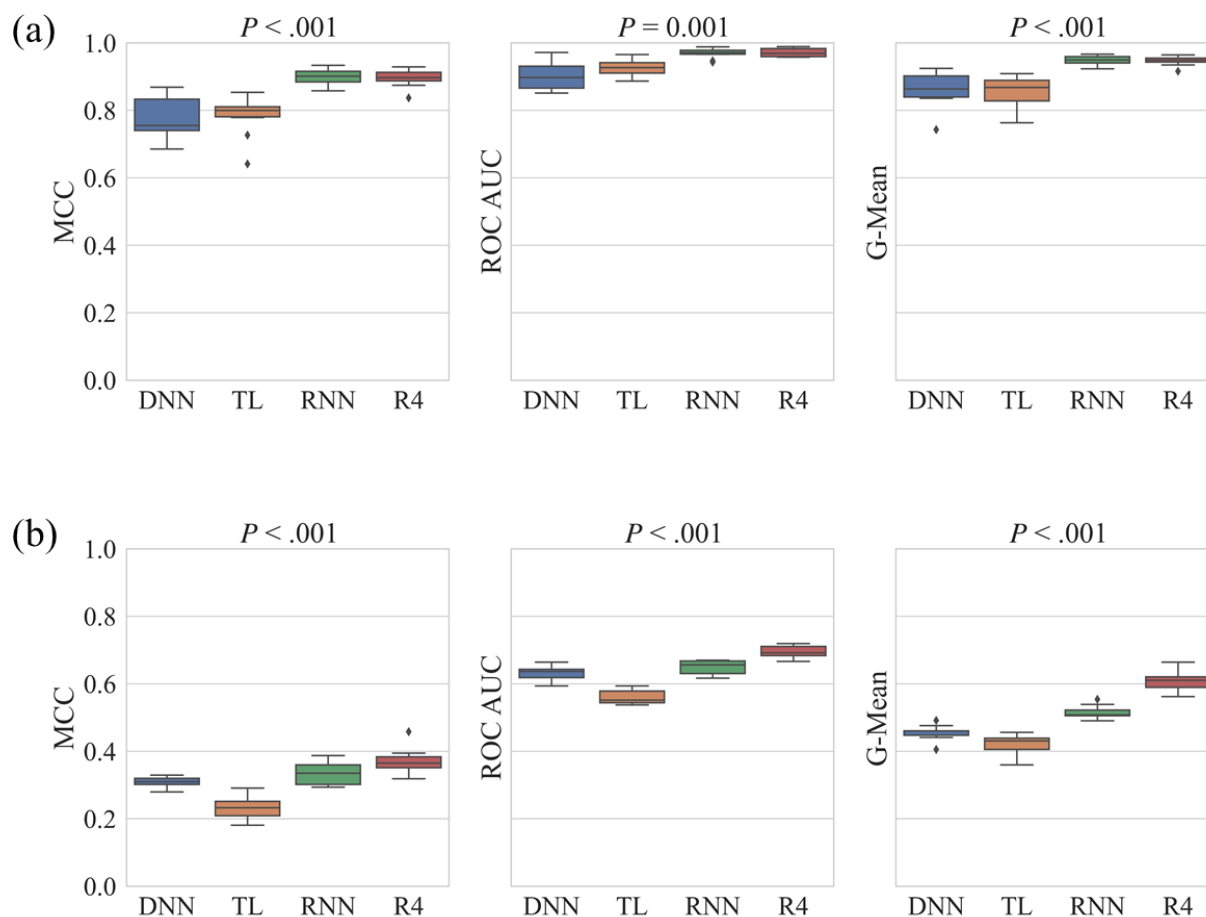

**Figure S11.** Boxplots comparing the performance of DNN models for metabotropic glutamate receptor 5 against the two dataset-balancing methods (TL and RNN/R4) during (a) 10-fold cross validation and (b) scaffold-split-generated test set for MCC, ROC AUC, and G-Mean. The  $P$ -value determined using Friedman's test is shown above each plot. MCC: Matthews correlation coefficient; ROC AUC: area under the receiver operating characteristic curve; G-Mean: geometric mean of sensitivity and specificity; DNN: deep neural network; TL: transfer learning; RNN: recurrent neural network; R4: REINVENT4.

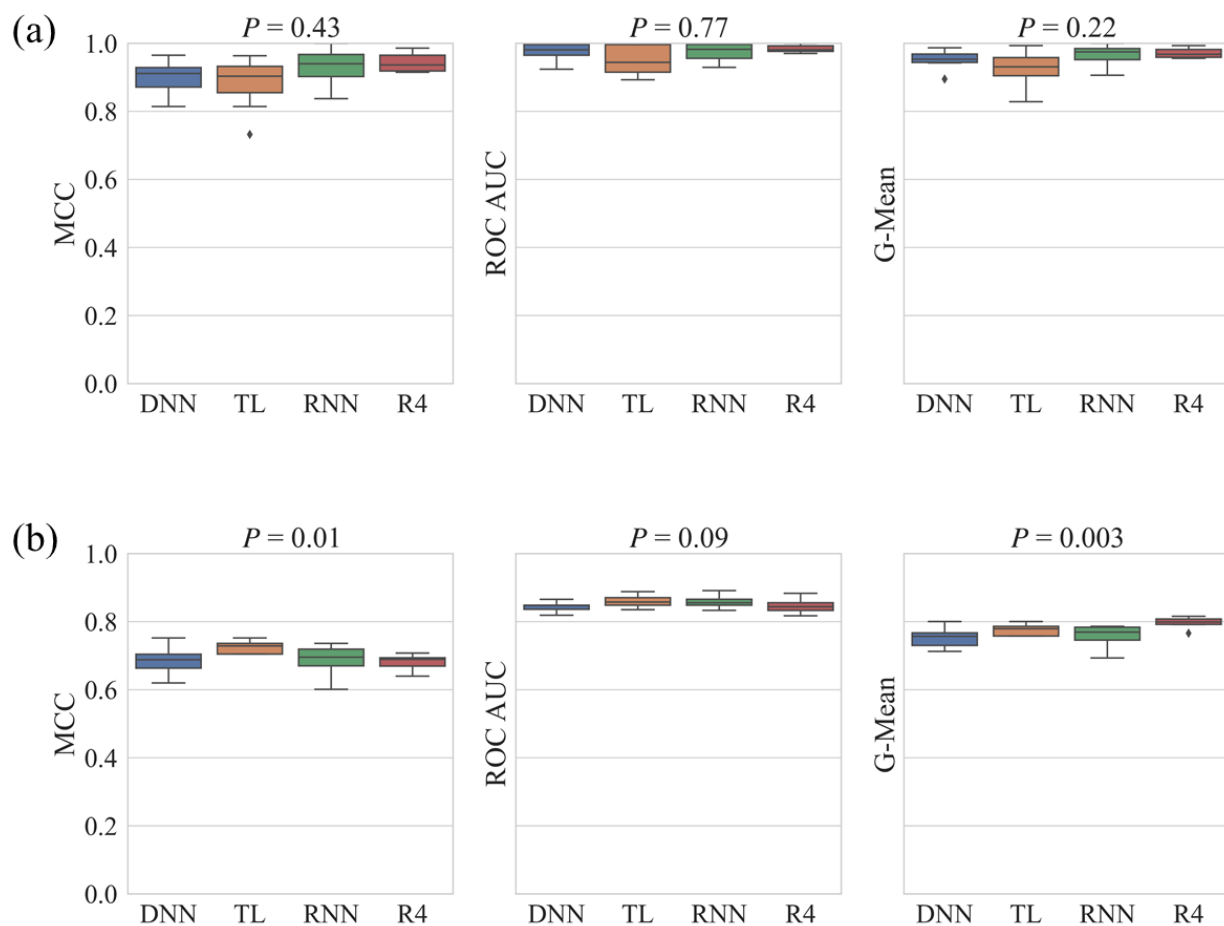

**Figure S12.** Boxplots comparing the performance of DNN models for gastrin/cholecystokinin type B receptor against the two dataset-balancing methods (TL and RNN/R4) during (a) 10-fold cross validation and (b) scaffold-split-generated test set for MCC, ROC AUC, and G-Mean. The  $P$ -value determined using Friedman's test is shown above each plot. MCC: Matthews correlation coefficient; ROC AUC: area under the receiver operating characteristic curve; G-Mean: geometric mean of sensitivity and specificity; DNN: deep neural network; TL: transfer learning; RNN: recurrent neural network; R4: REINVENT4.

## References

- 1 Polykovskiy, D. *et al.* Molecular Sets (MOSES): a benchmarking platform for molecular generation models. *Front Pharmacol* **11**, 565644 (2020).
